# Supplementary material for: Near surface properties of mixtures of propylammonium nitrate with n-alkanols 1. Nanostructure
Source: Royal Society of Chemistry journal article supplement (doi:10.1039/c5cp04786b), 2015-01-01
Supplement: c5cp04786b1.pdf [file c5cp04786b1.pdf]

# Near Surface Properties of Mixtures of Propylammonium Nitrate with n-Alkanols 1. Nanostructure

Aaron Elbourne,<sup>1</sup> Samuel Cronshaw,<sup>1</sup> Kislun Voïchovsky,<sup>2</sup> Gregory G. Warr,<sup>3</sup> and Rob  
Atkin<sup>1,\*</sup>

<sup>1</sup> Discipline of Chemistry, The University of Newcastle, NSW 2308, Callaghan, Australia.

<sup>2</sup> Department of Physics, Durham University, Durham, England, United Kingdom.

<sup>3</sup> School of Chemistry, The University of Sydney, NSW 2006, Australia.

\* Corresponding author

Electronic Supplementary Information

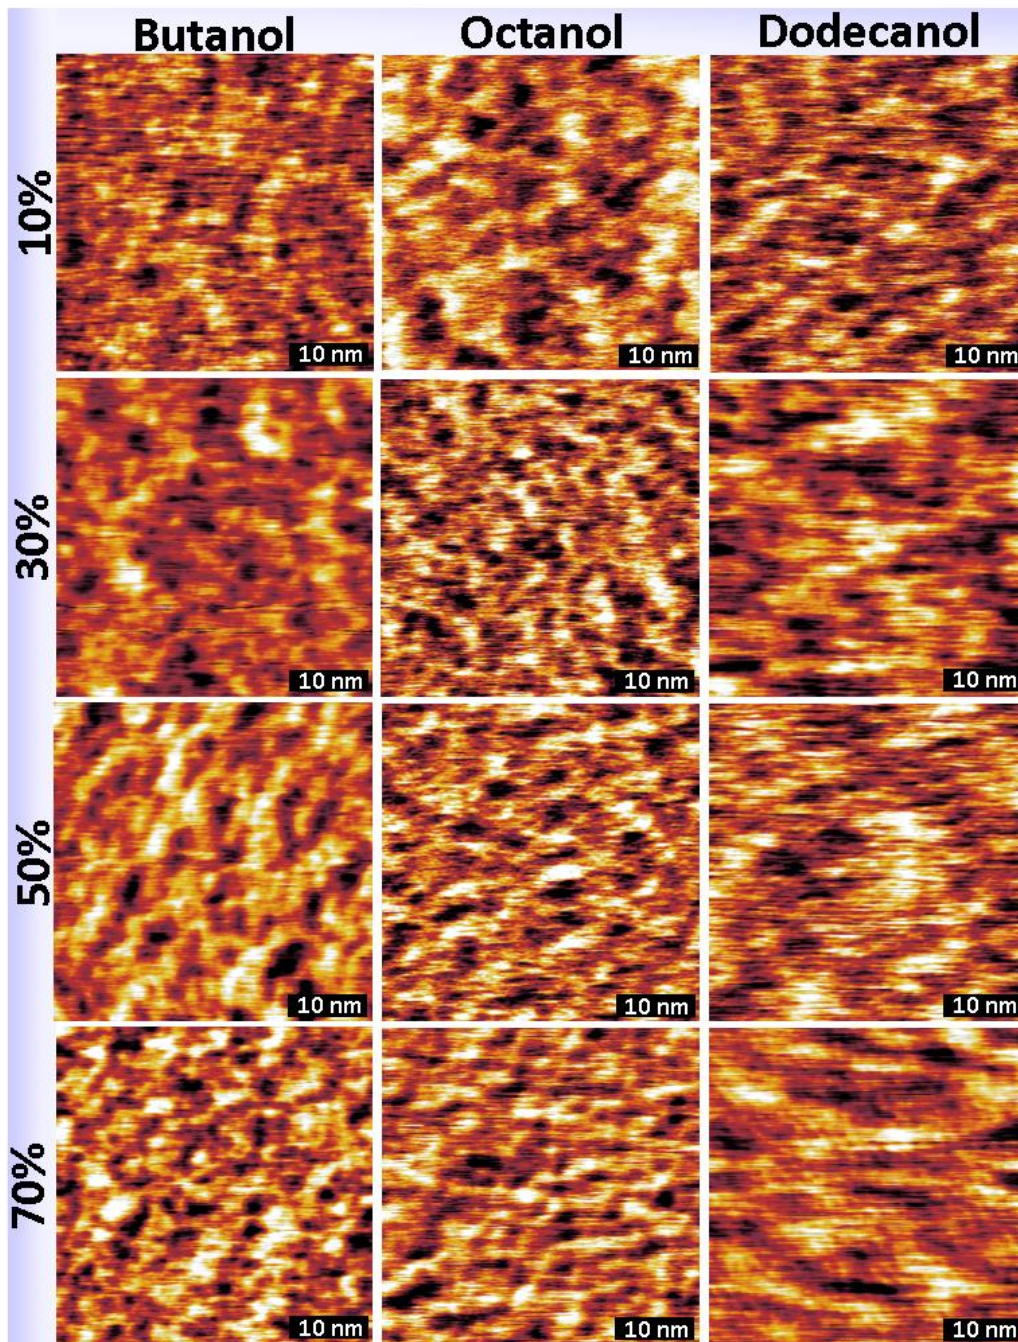

Figure A. 40 nm x 40 nm topographical AM-AFM images of the near-surface layer of n-alkanol: PAN mixtures with the contrast reversed, such that compliant areas appear bright and noncompliant areas dark. Columns 1-3 show topographical images for 1-butanol, 1-octanol and 1-dodecanol, respectively. The volume percentage of alkanol increases down a column as indicated. The inset in the top left of each image shows the PAN:-n-alkanol ratio.
